# Supplementary material
Source: PubMed Central journal article supplement (PMC7371536)
Supplement: NIHMS1594391-supplement-1.pdf [file NIHMS1594391-supplement-1.pdf]

## Journal of Hepatology

### CTAT methods

Tables for a “Complete, Transparent, Accurate and Timely account” (CTAT) are now mandatory for all revised submissions. The aim is to enhance the reproducibility of methods.

- Only include the parts relevant to your study
- Refer to the CTAT in the main text as ‘Supplementary CTAT Table’
- Do not add subheadings
- Add as many rows as needed to include all information
- Only include one item per row

**If the CTAT form is not relevant to your study, please outline the reasons why:**

|  |
|--|
|  |
|--|

#### 1.1 Antibodies

| Name                                                   | Citation       | Supplier                  | Cat no.        | Clone no. |
|--------------------------------------------------------|----------------|---------------------------|----------------|-----------|
| rabbit polyclonal anti-myeloperoxidase                 | PMID: 23415223 | Invitrogen                | Cat #PA5-16672 |           |
| rabbit monoclonal anti-F4/80                           | PMID: 30123064 | Invitrogen                | MA5-16363      | SP115     |
| polyclonal guinea pig anti-insulin                     | PMID: 29432124 | Abcam                     | ab7842         |           |
| polyclonal rabbit anti-glucagon                        | PMID: 28566287 | Cell Signaling Technology | 2760           |           |
| Alexa-Fluor-488-conjugated goat anti-rabbit IgG        | PMID: 28256511 | Molecular Probes          | A-11008        |           |
| Alexa-Fluor-594-conjugated goat anti-rabbit IgG        | PMID: 31819047 | Fisher Scientific         | A32740         |           |
| Alexa- Fluor-488-conjugated rabbit anti-guinea pig IgG |                | Invitrogen                | A18883         |           |
| Rabbit anti-phospho-Akt (Ser473)                       | PMID: 30413718 | Cell Signaling Technology | 9018           |           |
| Rabbit anti-Akt                                        | PMID: 29578538 | Cell Signaling Technology | 2938           |           |

|                                                   |                |                           |           |  |
|---------------------------------------------------|----------------|---------------------------|-----------|--|
| Rabbit anti-alpha-Actinin antibody                | PMID: 21490960 | Santac Cruz Biotech       | sc-7454-R |  |
| HRP-conjugated anti-rabbit IgG secondary antibody | PMID: 31819055 | Cell Signaling Technology | 7074      |  |

## 1.2 Cell lines

| Name | Citation | Supplier | Cat no. | Passage no. | Authentication test method |
|------|----------|----------|---------|-------------|----------------------------|
| N.A. |          |          |         |             |                            |

## 1.3 Organisms

| Name                        | Citation | Supplier | Strain  | Sex  | Age       | Overall n number |
|-----------------------------|----------|----------|---------|------|-----------|------------------|
| TghPNPLA3-I148I             |          | Cyagen   | C57BL/6 | Male | 6-8 weeks | 13               |
| TghPNPLA3-I148M             |          | Cyagen   | C57BL/6 | Male | 6-8 weeks | 14               |
| the non-transgenic controls |          | Cyagen   | C57BL/6 | Male | 6-8 weeks | 13               |

## 1.4 Sequence based reagents

| Name            | Sequence                                                                                               | Supplier                    |
|-----------------|--------------------------------------------------------------------------------------------------------|-----------------------------|
| mUCP-1          | forward primer (5'-3')<br>GGATTGGCCTCTACGACTCA<br>reverse primer (5'-3')<br>TAAGCCGGCTGAGATCTTGT       | Integrated DNA Technologies |
| mPGC-1 $\alpha$ | forward primer (5'-3')<br>CGCTAGCAAGTTTGCCTCAT<br>reverse primer (5'-3')<br>TGAAGTGGTGTAGCGACCAA       | Integrated DNA Technologies |
| mPPAR gamma     | forward primer (5'-3')<br>CGGGTGGGACTTTTCTGCTAATACA<br>reverse primer (5'-3')<br>TTCGCCAAGGTGCTCCAGAAG | Integrated DNA Technologies |
| mCidea          | forward primer (5'-3')<br>TGCTCTTCTGTATCGCCCAGT                                                        | Integrated DNA Technologies |

|         |                                                                                                                                                         |                                |
|---------|---------------------------------------------------------------------------------------------------------------------------------------------------------|--------------------------------|
| mNrf1   | reverse primer (5'-3')<br>GCCGTGTTAAGGAATCTGCTG<br><br>forward primer (5'-3')<br>CAACAGGGAAGAAACGGAAA<br>reverse primer (5'-3')<br>GTGGCTCTGAGTTTCCGAAG | Integrated DNA<br>Technologies |
| mCox8b  | forward primer (5'-3')<br>GCGAAGTTCACAGTGGTTCC<br>reverse primer (5'-3')<br>GGAACCATGAAGCCAACGAC                                                        | Integrated DNA<br>Technologies |
| mCox7a1 | forward primer (5'-3')<br>AGCGTCATGGTCAGTCTGT<br>reverse primer (5'-3')<br>AACCGTGTGGCAGAGA                                                             | Integrated DNA<br>Technologies |
| mFdft1  | forward primer (5'-3')<br>ATGGAGTTCGTCAAGTGTCTAGG<br>reverse primer (5'-3')<br>CGTGCCGTATGTCCCCATC                                                      | Integrated DNA<br>Technologies |
| mMylip  | forward primer (5'-3')<br>ATGCTGTGCTATGTGACGAGG<br>reverse primer (5'-3')<br>TCGATGATCCCTAGACGCCTG                                                      | Integrated DNA<br>Technologies |
| mSqle   | forward primer (5'-3')<br>ATAAGAAATGCGGGGATGTCAC<br>reverse primer (5'-3')<br>ATATCCGAGAAGGCAGCGAAC                                                     | Integrated DNA<br>Technologies |
| mHMGCS1 | forward primer (5'-3')<br>AACTGGTGCAGAAATCTCTAGC<br>reverse primer (5'-3')<br>GGTTGAATAGCTCAGAACTAGCC                                                   | Integrated DNA<br>Technologies |
| mNsdhl  | forward primer (5'-3')<br>TCATGGTGAATCAAAGCGAGG<br>reverse primer (5'-3')<br>CCGGGGTTATCAAAGCCTTG                                                       | Integrated DNA<br>Technologies |
| mSc5d   | forward primer (5'-3')<br>TCTCAGTGCCGCCGATTACTA<br>reverse primer (5'-3')<br>CTTGACAGTGAACACGATCTCA                                                     | Integrated DNA<br>Technologies |
| mLss    | forward primer (5'-3')<br>TCGTGGGGGACCCTATAAAAC<br>reverse primer (5'-3')<br>CGTCCTCCGCTTGATAATAAGTC                                                    | Integrated DNA<br>Technologies |

|          |                                                                                                     |                                |
|----------|-----------------------------------------------------------------------------------------------------|--------------------------------|
| mDhcr7   | forward primer (5'-3')<br>AGGCTGGATCTCAAGGACAAT<br>reverse primer (5'-3')<br>GCCAGACTAGCATGGCCTG    | Integrated DNA<br>Technologies |
| mCyp51   | forward primer (5'-3')<br>GACAGGAGGCAACTTGCTTTC<br>reverse primer (5'-3')<br>GTGGACTTTTCGCTCCAGC    | Integrated DNA<br>Technologies |
| mSoat2   | forward primer (5'-3')<br>ACAAGACAGACCTCTTCCCTC<br>reverse primer (5'-3')<br>ATGGTTCGGAAATGTTGCACC  | Integrated DNA<br>Technologies |
| mTm7sf2  | forward primer (5'-3')<br>GTCGCGGCTTTACTGATCCT<br>reverse primer (5'-3')<br>CAGGCAGATAGGCCGGTAG     | Integrated DNA<br>Technologies |
| mHsd17b7 | forward primer (5'-3')<br>ACGGGCCAAAAGGTACATAATC<br>reverse primer (5'-3')<br>CCAGCATGAGGACTCGGAT   | Integrated DNA<br>Technologies |
| mldlr    | forward primer (5'-3')<br>TGA CTCAGACGAACAAGGCTG<br>reverse primer (5'-3')<br>ATCTAGGCAATCTCGGTCTCC | Integrated DNA<br>Technologies |
| mAbca1   | forward primer (5'-3')<br>GCTTGTTGGCCTCAGTTAAGG<br>reverse primer (5'-3')<br>GTAGCTCAGGCGTACAGAGAT  | Integrated DNA<br>Technologies |
| mABCG1   | forward primer (5'-3')<br>CTTTCCTACTCTGTACCCGAGG<br>reverse primer (5'-3')<br>CGGGGCATTCCATTGATAAGG | Integrated DNA<br>Technologies |
| mPpia    | forward primer (5'-3')<br>CACCGTGTTCTTCGACATCA<br>reverse primer (5'-3')<br>CAGTGCTCAGAGCTCGAAAGT   | Integrated DNA<br>Technologies |
| mGapdh   | forward primer (5'-3')<br>AGGTCGGTGTGAACGGATTTG<br>reverse primer (5'-3')<br>GGGGTCGTTGATGGCAACA    | Integrated DNA<br>Technologies |

## 1.5 Biological samples

| Description              | Source          | Identifier |
|--------------------------|-----------------|------------|
| Tissues sample from mice | Transgenic mice |            |

## 1.6 Deposited data

| Name of repository | Identifier | Link |
|--------------------|------------|------|
| N.A.               |            |      |

## 1.7 Software

| Software name                        | Manufacturer                                                                                            | Version |
|--------------------------------------|---------------------------------------------------------------------------------------------------------|---------|
| R                                    | R Development Core Team                                                                                 | 3.5.0   |
| SAIGE                                | Zhou W et al.                                                                                           | 0.29    |
| PLINK                                | Shaun Purcell                                                                                           | 1.9     |
| R package:<br>MendelianRandomization | Yavorska OO et al.                                                                                      | 0.4.1   |
| R package: MRPRESSO                  | Verbanck M et al.                                                                                       | 1.0     |
| R package: RadialMR                  | Bowden J et al.                                                                                         | 0.4     |
| ImageJ                               | National Institutes of Health<br>and the Laboratory for<br>Optical and Computational<br>Instrumentation | 1.51k   |
| GraphPad Prism                       | GraphPad Software                                                                                       | 6.00    |
| G*Power                              | Faul F et al.                                                                                           | 3.1     |

## 1.8 Other (e.g. drugs, proteins, vectors etc.)

|                                                   |                     |                                            |
|---------------------------------------------------|---------------------|--------------------------------------------|
| Regular chow diet                                 | ENVIGO              | Teklad Diets 2018SX                        |
| High-sucrose diet                                 | Research Diets      | D17070603                                  |
| HFFC diet                                         | Research Diets      | D18021203                                  |
| Glucose                                           | Sigma               | G8270                                      |
| Insulin                                           | Lilly               | U-100                                      |
| Mouse ultrasensitive insulin<br>ELISA kit         | ALPCO               | 80-INSMSU-E10                              |
| Total Cholesterol<br>(Cholesterol E)              | Wako                | 999-02601                                  |
| L-Type Triglyceride M                             | Wako                | 994-02891 (Color A)<br>990-02991 (Color B) |
| Direct Red 80                                     | Sigma-Aldrich       | 365548                                     |
| Fast Green FCF                                    | Fisher Scientific   | F99-10                                     |
| Permout™ mounting<br>medium                       | Fisher Scientific   | SP15-100                                   |
| VECTASHIELD® antifade<br>mounting media with DAPI | Vector Laboratories | H-1800                                     |
| ECL Western Blotting<br>Substrate                 | Fisher Scientific   | 32106                                      |
| TRI Reagent                                       | Sigma-Aldrich       | 93289-100ML                                |
| High-Capacity cDNA<br>Reverse Transcription Kit   | Fisher Scientific   | 43-688-14                                  |
| SYBR Green PCR Master<br>Mix                      | Fisher Scientific   | A25777                                     |
|                                                   |                     |                                            |

**1.9 Please provide the details of the corresponding methods author for the manuscript:**

Computational part: Name: Zhipeng Liu, , Address: 2246 south beck lane apt. 201, Lafayette, IN, 47906, Telephone: 7658389828, Fax: 3139728025, Email: [liu1449@purdue.edu](mailto:liu1449@purdue.edu)

Experimental part: Name: Yang Zhang, Address: 4500 Cass Ave, Apt 1002, Detroit, Michigan, 48201, Telephone: 3179987032, Fax: 3139728025, Email: [Yang518@wayne.edu](mailto:Yang518@wayne.edu)

**2.0 Please confirm for randomised controlled trials all versions of the clinical protocol are included in the submission. These will be published online as supplementary information.**

N.A.
